# A deep learning and digital archaeology approach for mosquito repellent discovery

Jennifer N. Wei<sup>1\*,†</sup>, Marnix Vlot<sup>2\*</sup>, Benjamin Sanchez-Lengeling<sup>1</sup>, Brian K. Lee<sup>1</sup>, Luuk Berning<sup>2</sup>, Martijn W. Vos<sup>2</sup>, Rob W.M. Henderson<sup>2</sup>, Wesley W. Qian<sup>1</sup>, D. Michael Ando<sup>3</sup>, Kurt M. Groetsch<sup>4</sup>, Richard C. Gerkin<sup>1</sup>, Alexander B. Wiltschko<sup>1,†</sup>, Koen J. Dechering<sup>2,†</sup>

<sup>1</sup> Google Research, Brain Team; Cambridge, MA, USA

<sup>2</sup> TropiQ Health Sciences, The Netherlands

<sup>3</sup> Google Applied Sciences; Mountain View, CA, USA

<sup>4</sup> Google Books Team; Mountain View, CA, USA

\* Denotes equal contribution

† Corresponding authors.

## Abstract

Insect-borne diseases kill >0.5 million people annually. Currently available repellents for personal or household protection are limited in their efficacy, applicability, and safety profile. Here, we describe a machine-learning-driven high-throughput method for the discovery of novel repellent molecules. To achieve this, we digitized a large, historic dataset containing ~19,000 mosquito repellency measurements. We then trained a graph neural network (GNN) to map molecular structure and repellency. We applied this model to select 317 candidate molecules to test in parallelizable behavioral assays, quantifying repellency in multiple pest species and in follow-up trials with human volunteers. The GNN approach outperformed a chemoinformatic model and produced a hit rate that increased with training data size, suggesting that both model innovation and novel data collection were integral to predictive accuracy. We identified >10 molecules with repellency similar to or greater than the most widely used repellents. This approach enables computational screening of billions of possible molecules to identify empirically tractable numbers of candidate repellents, leading to accelerated progress towards solving a global health challenge.

## Introduction

Mosquitos and other blood-sucking arthropods carry and transmit diseases that kill hundreds of thousands of people each year<sup>1,2</sup>. To make continued progress on this global health issue, we must discover, manufacture, and deploy more efficient molecules for pest control across a variety of application spaces collectively termed “vector control”; this includes molecules that affect life history traits, such as insecticides, and molecules that affect host-seeking behavior, e.g. topical repellents for personal protection and spatial repellents applied to a home or room. Commonly used repellents such as DEET (N,N-diethyl-meta-toluamide), Picaridin (Hydroxyethyl isobutyl piperidine carboxylate), and IR3535 (Ethyl butylacetylaminopropionate) require high concentrations of over 40%

which limit their use to topical applications. Furthermore, they have undesirable properties and/or safety profiles; for example, DEET is a plasticizer, precluding its use on synthetic clothing or shelter surfaces, and it is toxic to some vertebrate wildlife<sup>3</sup>. Some commonly used repellents are species-specific; for example IR3535 is effective against *Aedes aegypti* but is ineffective against *Anopheles* mosquitoes and is therefore not recommended for use in malaria-endemic regions. Over the past few decades, only a few dozen new repellent molecule candidates have been found and very few have reached the market; an approach to rapidly discover and validate large numbers of new candidates is desperately needed.

Multiple strategies exist for identifying insect repellent candidates. Behavioral assays seek to directly test repellent activity in realistic conditions. Recognizing the devastating effect of insect-borne diseases (including dengue fever) faced by the United States Army during the second world war, the U.S. Department of Agriculture (USDA) tested 30,000 molecules for their effectiveness as repellents and insects on mosquitos, ticks, and other insect species<sup>4,5</sup>. In particular, 14,000 molecules were tested for their effectiveness as mosquito (*A. aegypti* and *A. quadrimaculatus*) repellents using human volunteers; this effort led to the discovery of DEET. Structure-targeted modeling of the obligatory insect olfactory co-receptor Orco led to discovery of picaridin<sup>6</sup> and VUAA1<sup>7</sup>. Scaffold-hopping techniques<sup>8</sup> can focus the molecular search space, and in combination with arm-in-cage testing, led to the discovery of IR3535<sup>9</sup> and DEPA<sup>10</sup>. Chemoreceptor studies exploit the molecular mechanism of action: DEET and IR3535 modulate the activity of odorant and gustatory receptors<sup>11,12</sup> but may also affect cholinergic signaling<sup>13,14</sup>. The exact molecular details of their mode of action are not fully understood, and may be very species-specific ([Afify and Potter, 2020](#)). It is difficult to more broadly and systematically explore molecular space using each of these approaches, as they can be labor-intensive.

The USDA dataset represents a wealth of information on the relationship between molecular structure and arthropod behavior. Small parts of this dataset have been used previously to train computational models of mosquito repellency<sup>15-17</sup>, typically on specific structural families of molecules. Katritzky et al.<sup>18</sup> used an artificial neural network model trained on 167 carboxamides and found 1 carboxamide candidate with high repellency activity. As modern deep learning models show performance which scales in proportion to the volume of their training data<sup>19</sup>, we hypothesized that exploiting the full size of the USDA dataset would provide a strong starting point for a new deep learning model. We selected a graph neural network architecture (GNN), as GNNs have been shown to have superior performance to computable chemoinformatics descriptors in predicting the properties of a molecule from its chemical structure, given a sufficiently large dataset<sup>20,21</sup>. Notably, previous work demonstrated that a GNN-based human odor model outperforms standard cheminformatics models even on insect behavior datasets.<sup>15-17</sup>

Here we present a data-driven workflow for the discovery and validation of novel molecules for behavioral modification in arthropods. The critical components underlying the success of this approach are 1) expanded training data made possible by a complete digitization of the USDA dataset; 2) high-quality validation data using a parallelizable membrane-feeding assay that does not require human volunteers; and 3) a graph neural network model to learn the relationship between molecular

structure and these data. We iteratively use this model to propose candidates from a purchasable chemical library, validate these candidates for repellency, and use these results to expand the training dataset and therefore improve the predictive accuracy of the behavior model (Figure 1). Through this process we have discovered a chemically diverse set of molecules with effectiveness equal to or greater than DEET, unlocking new potential capabilities in vector control.

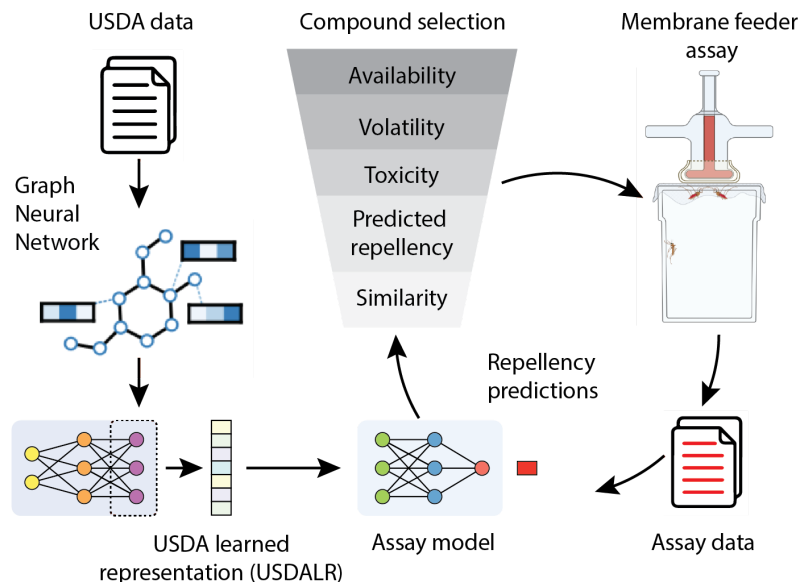

**Figure 1:** Pipeline for active learning of new behavior repellent molecules. A large historical dataset from the USDA (*USDA data*) was used to train a graph neural network to generate a fixed vector representation of any candidate molecule (*USDA learned representation, USDALR*). To create the transfer-learned *assay model*, molecules are first embedded with the USDA learned representation and fed to a dense neural network; this assay model is trained on the *assay data*. A large-scale *in silico* molecular screen is applied to select candidate molecules for testing in a membrane feeder assay for repellency. Resulting data are used to train the assay model. In subsequent iterations, the assay results are used to improve the transfer-learning model, a form of active learning.

## Results

### Digitizing a rich historical dataset

The USDA dataset is unmatched in size and scope, but for decades existed only in print. Google Books scanned and made available the original work online<sup>4</sup>, and for this work we subsequently converted it into a machine-readable format. After some preprocessing to make the dataset easier to read, we employed expert curators to transcribe the full records and provide canonical structures for each listed molecule (Fig. 2A, Methods). We then focused our analysis on the four mosquito repellency assays contained in this dataset: two mosquito species, *Aedes aegypti* and *Anopheles quadrimaculatus*; and two repellency contexts, skin and cloth. Together these comprise ~19,000

labeled data points on repellency of specific molecules (Fig. 2B), representing a broad range of structural and functional classes (Fig. 2C). This large dataset served as training data for our modeling efforts.

## Assessment of repellent candidates

In order to test model predictions and iteratively expand the training data, we adapted a standard membrane feeding assay (SMFA), commonly used in malaria research<sup>22,23</sup>, to evaluate the repellency against *Anopheles stephensi* mosquitoes. Repellency was evaluated by prevention of blood feeding relative to a vehicle (ethanol) control (Fig. 2D). The assay was used to evaluate each molecule's potency and duration of effect as exemplified for the reference molecule DEET in Fig 2E. We assessed the inherent inter-assay reliability by comparing repellency levels for a diverse set of molecules from independent experiments (tested at 25  $\mu\text{g}/\text{cm}^2$ ,  $r=0.81$ , Fig. 2F). Using a cut-off of 75% repellency as measured 120 min after initial application, selected to include widely used repellents (e.g. DEET, dimethyl phthalate, and indalone), approximately 3/4 of the molecules classified as active in a first assay were confirmed to be active upon re-testing.

The USDA dataset was collected ~70 years ago using arm-in-cage experiments, involving human volunteers, while our assay was conducted with a surrogate target. We evaluated the relationship between these two experiments by directly comparing the activity of 38 molecules with their repellency reported in the USDA dataset. We found considerable concordance between the historical USDA dataset and the membrane feeding assays ( $p<0.01$  Mann Whitney U test, Fig. 2G), despite differences in experimental setup. However, some disagreement was observed, highlighting the need for additional data collection.

## Modeling mosquito repellency behavior

Using the USDA dataset, we sought to create a representation of molecules specific to mosquito repellency behavior. It has been previously demonstrated that graph neural networks (GNNs) are particularly adept at creating task-specific representations<sup>20,24</sup>, and that representational power extends to the domain of olfaction<sup>25,26</sup>. We trained GNN models on the USDA dataset, observing an AUC=0.881 on the cloth-*Aedes aegypti* task, the task with the largest dataset (Methods). We then use the output heads from the ensemble models on all four USDA tasks to create the *USDA learned representation* (USDALR, Figure 1).

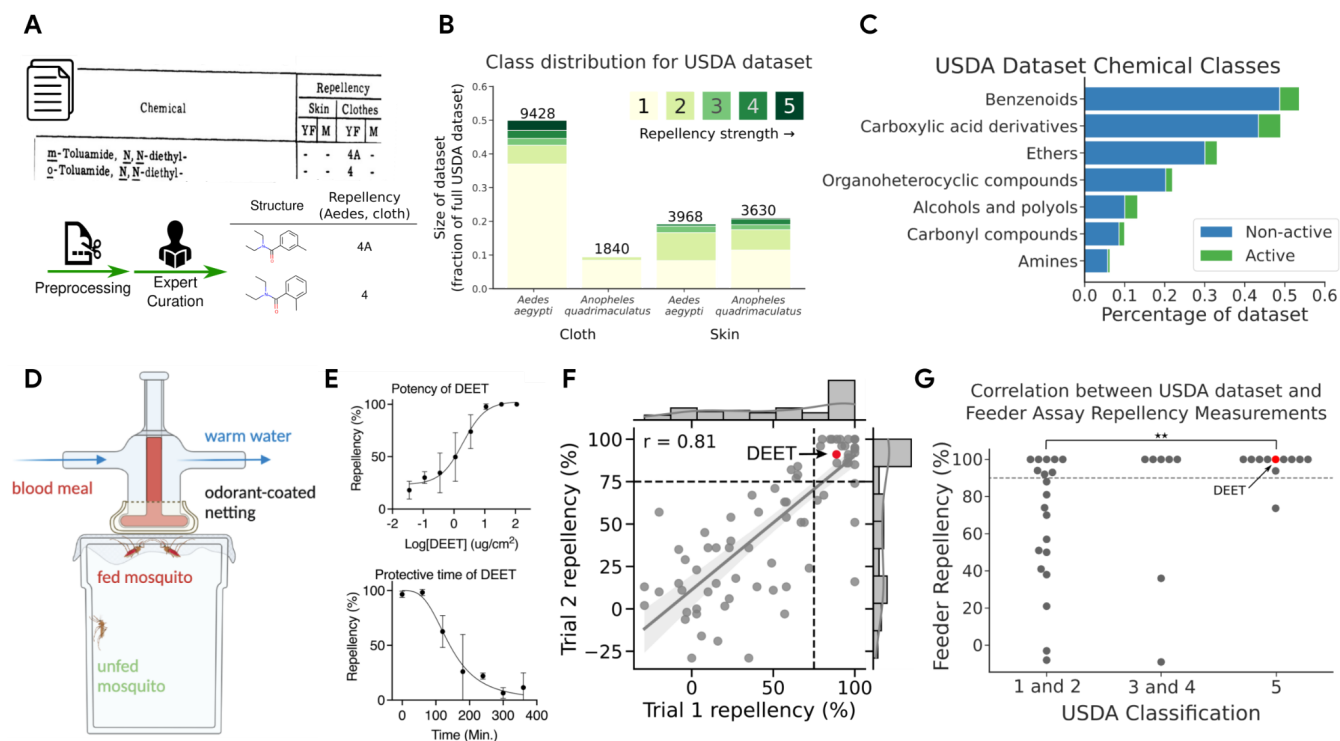

**Figure 2: Overview of data sources.** (A) The USDA dataset scanned into Google Books was digitized and manually curated into a machine-readable table of repellency ratings for each compound (King, WV 1954). (B) Digitized ratings from USDA dataset used here covered two assay types and two mosquito species. (C) The USDA dataset covered a diverse range of chemical classes; shown here is the distribution of some ClassyFire classes (Djombou-Feunang et al. 2016). Active compounds are defined as class 4 or higher. (D) Our validation assay used warmed blood and an odorant-coated netting; repellency was identified with a decrease in feeding behavior relative to a control odorant (ethanol). (E) Repellency measured using the assay in (D); 100% indicates total repellency (no feeding) and 0% matches behavior using the solvent alone. Data points (mean +/- SD across replicates) show repellency using the indicated concentration of DEET as the odorant. Top: Repellency of DEET at t=120 min. increases with concentration. Bottom: Repellency decreases with time after initial application of the odorant (sigmoidal fit). (F) Repellency values are correlated across independent replications of the assay. Trials 1 and 2 are not necessarily in chronological order. Test-retest values of DEET are indicated in red. Dotted line indicates positive activity cutoff at Repellency=0.75 for t=120min. (G) Repellency observed in the assay at t=2 min. at 1% concentration using *A. stephensi* is concordant with repellency from the USDA dataset using *A. aegypti* on cloth. Dotted line represents activity cutoff at Repellency=0.9 for t=2min. for feeder assay. DEET's activity is represented by a red dot. Raw repellency % for USDA Class 1&2 vs Class 5: p<0.01 (Mann-Whitney U Test); Hit percentage: p<0.05 (Z-test of proportions).

We sought to build a model that was specific for the activity behavior in our membrane feeder assay. We created an assay model by first using the fixed USDA learned representation to embed input molecules, then adding a two layer, 256-node neural network to learn to predict the assay data.

We applied the assay model to make predictions on novel repellent candidate compounds from a large library of purchasable molecules provided by the vendor eMolecules<sup>27</sup>. We filtered this library for desirable qualities such as volatility and low cost, and we further screened out molecules which did not pass an inhalation toxicity filter (Methods). From among those compounds passing these filters (~10k molecules), we selected those which had sufficient predicted repellency and--to ensure novelty--which were structurally distinct (Tanimoto similarity <0.8) from those in the USDA dataset or

previous candidate selections. Assay results from each batch of selections were added to the assay dataset; for each subsequent batch of selections, the assay model was re-trained on the expanded assay dataset. Detailed notes on the specific modeling setup for each batch are located in the Supplementary section.

Over several iterations, a total of 400 molecules were purchased and further screened empirically according to a solubility criterion (Methods); those that passed (n=317) were then tested for repellency with the membrane-feeder assay. Over the course of selections spanning over a year, some adjustments were made to both the USDA model and the membrane-feeder assay. In particular, our hit definition evolved with our dataset size and model capability: we initially defined a hit as  $\geq 90\%$  repellency using a dose of  $25 \mu\text{g}/\text{cm}^2$  as measured at  $T=2\text{min}$  ( $\geq 1$  measurement), but in the final batch of selections, we changed our definition to  $\geq 75\%$  repellency as measured at  $T=120\text{min}$  ( $\geq 3$  measurements).

## The hit rate improves with training data size

To evaluate the contribution of the training data to our performance, we retrospectively scored high-repellency candidates in two phases: before the USDA dataset was available (pre-USDA) and after we began using the USDA dataset to build and deploy the USDA learned representation (post-USDA). In the pre-USDA phase, instead of using the USDA learned representation to embed molecules, we employed an odor-specific representation previously demonstrated to outperform standard cheminformatics representations on olfaction related tasks<sup>26</sup>. Further, at that time, we only had assay data for 34 molecules, so we opted to use a k-nearest neighbors model (k=10) to model assay activity. In the post-USDA phase, the assay dataset size for the first batch was 142 molecules, and grew to a size of 402 molecules for our final batch of selections (Supplemental Batch Notes).

This large dataset made a huge difference; hit rates post-USDA measured on repellency time=2min increased to 49% from the pre-USDA level of only 29% (Figure 3A). When we then raised the bar for “hit” classification to require a longer duration of effect, hit rates dropped to 6% for predictions from the post-USDA phase and 3% for predictions from the pre-USDA phase. It is important to note that only the *last* batch in the post-USDA phase was trained to find candidates meeting this new repellent standard; further iterations may have continued to improve performance as they did under the previous standard.

This “hit rate” comparison across the two different experimental phases aggregates changes in both representational approach and assay dataset size; how much did the USDA learned representation specifically, and by extension the USDA dataset, improve our model’s performance?

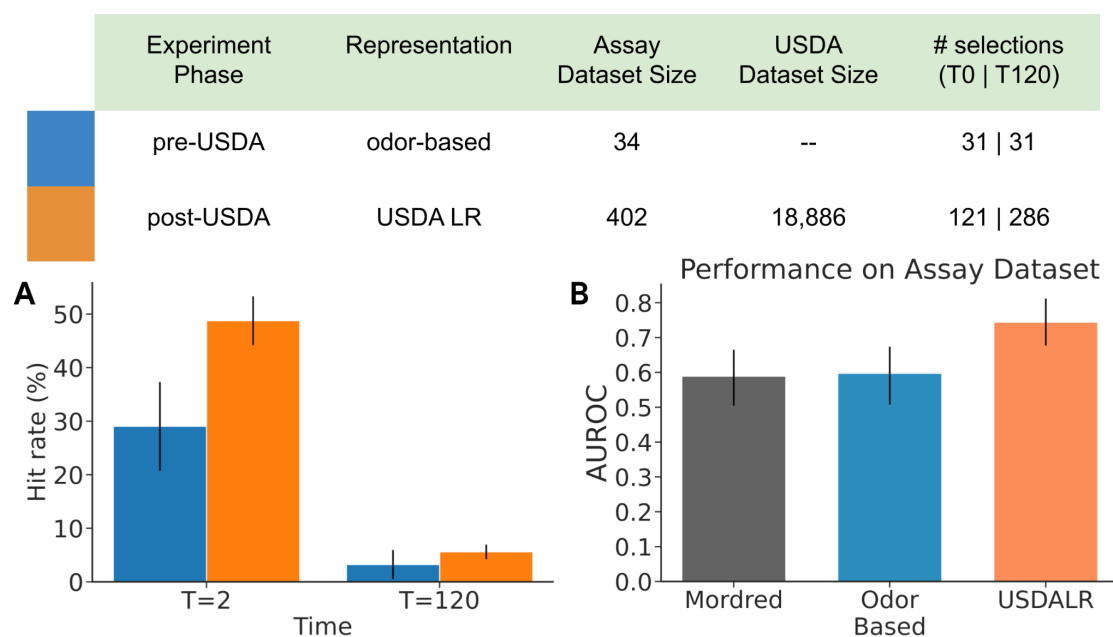

**Figure 3:** The table reflects experimental testing set up in pre-USDA phase, i.e. before the use of the USDA dataset for modeling, and post-USDA phase, i.e. after the use of the USDA dataset. **(A)** Active repellent compounds found at a much higher rate in post-USDA phase (49%) vs. pre-USDA phase (29%). Hits are defined as compounds that showed >90% repellency in the feeder assay at initial application (t=2 min) or >75% repellency after 2 hours of evaporation (t=120). Error bars represent the standard error of jackknife estimated mean values. **(B)** In a retrospective prediction task, USDA learned representation model (USDALR) outperforms models using cheminformatics representation (Mordred, Moriwaki et al, 2018) and odor-based representation (Qian et al. 2022). Models were trained on assay data collected before USDA modeling (88 data points), and evaluated on post-USDA measurements (170 data points). Error bars represent 95% bootstrap-resampling confidence intervals.

To estimate the contributions of the USDA representation, we performed a retrospective analysis comparing the USDA representation against two other chemical representation approaches: a cheminformatics representation (using Mordred descriptors<sup>28</sup>) and the odor-based representation<sup>26</sup> used in the pre-USDA phase. The same assay model architecture was used for the different representations. We split the full assay dataset into two parts, a training set composed of molecules from all batches of tests performed before the use of the USDA dataset (88 measurements) and an evaluation set of all molecules selected in the post-USDA phase (170 measurements).

We observed that the USDA learned representation model significantly outperformed both alternatives on this prediction task (Figure 3B; USDA model AUC=0.74 [0.68,0.81]; Chemoinformatics model AUC=0.59 [0.50,0.67]; GNN Odor model AUC=0.60 [0.51,0.67]), suggesting that the historical dataset played a significant role in the elevated predictive performance. There is a selection bias because the selection of molecules for evaluation was done by the assay model using USDA learned representations. One effect of this bias is that it reduces the expected number of negative examples, reducing the contrast between predicted repellents and non-repellents, resulting in a *negative* bias into all AUC measurements. However, the model used for selection should suffer the greatest negative bias, suggesting that the performance difference we observed is an underestimate of the

true advantage that the USDA model has over its alternatives, as would have been observed under a counterfactual unbiased selection of repellent candidates.

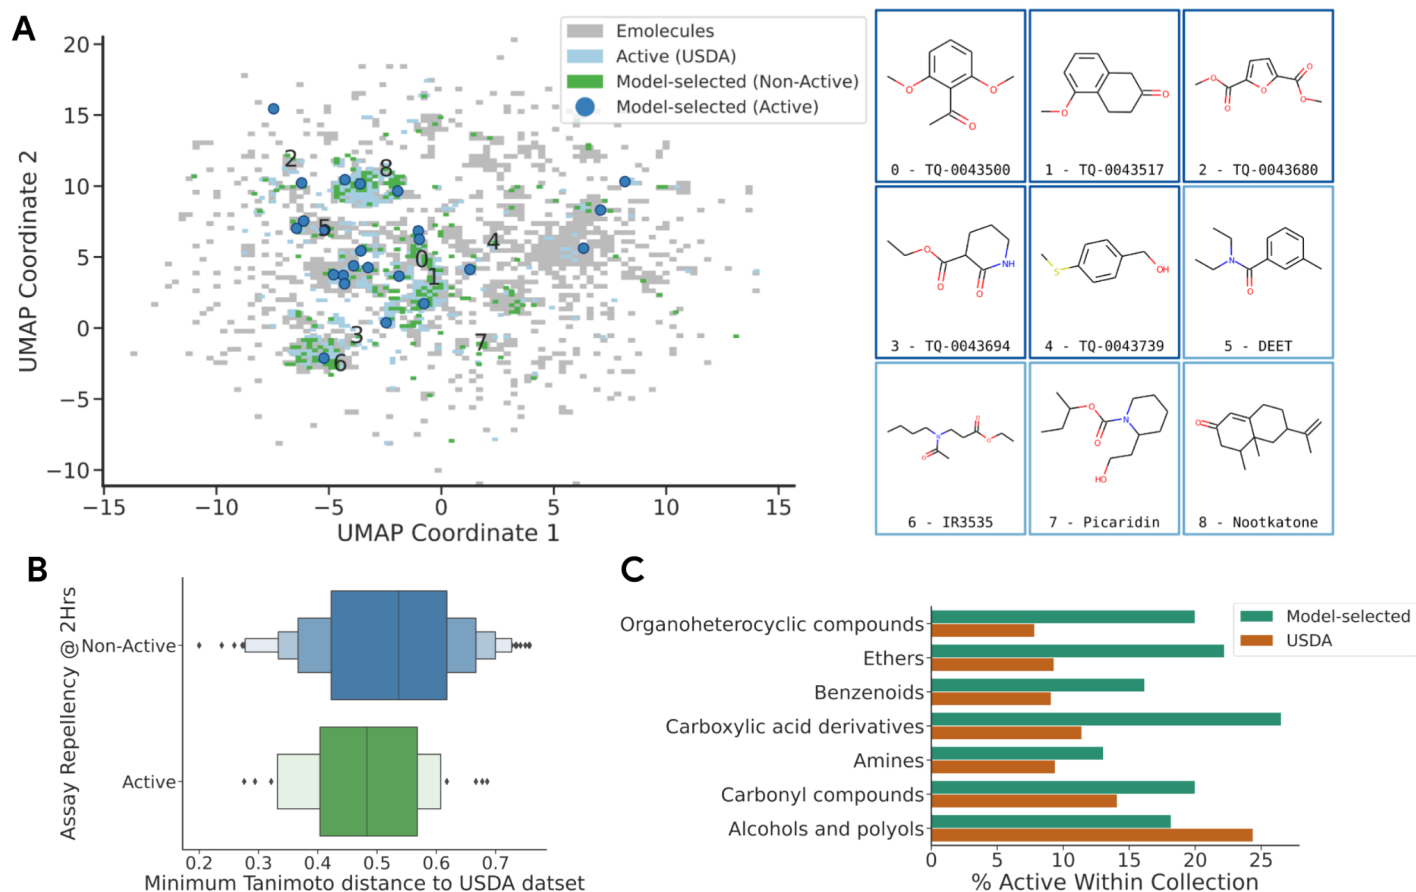

**Figure 4:** (A) The model-selected molecules are distributed throughout the chemical space, with some active molecules found both near and far from USDA clusters. Shown is a UMAP embedding of USDA active molecules (light blue), and model selected molecules (dark blue), aligned with the eMolecules library (grey heatmap), using Morgan fingerprint features ( $r=4$ ,  $n=2048$ ). The positions of a few high-repellency, model-selected compounds and several known repellents are shown. (B) Tanimoto distance of ML-selected candidates to the USDA dataset; molecules were selected to be at least Tanimoto distance=0.2 away from other USDA molecules, with active candidates having a lower median distance away from the USDA dataset (median=0.48) compared to inactive candidates (median=0.54). (C) Distribution of ClassyFire classes (Djoumbou-Feunang et al., 2016) in the USDA dataset and the TropiQ selections. TropiQ selections are enriched for organoheterocyclic compounds, ethers, benzenoids, and carboxylic acid derivatives.

### Selected hit molecules are chemically diverse

Training a model on a large pool of data containing a variety of molecules allows the model to generalize to larger areas of chemical space. Figure 4 shows the distribution of molecules selected by our post-USDA models, and compares them to the active molecules reported in the USDA dataset itself. The candidate selections made by our model explore some of the same regions of the USDA dataset, but find hits in some underexplored regions of the original dataset (Figure 4A). The ML-selected molecules were required to be a minimum of 0.2 Tanimoto distance from USDA molecules; we observe an overall median Tanimoto distance of 0.52 from USDA molecules across all



of our selections, and a median distance of 0.48 from USDA molecules amongst active molecules (Figure 4B). Using ClassyFire<sup>29</sup> to annotate each molecule, we found that molecules selected by our model are enriched in benzenoids, ethers, carboxylic acid derivatives, and organoheterocyclic molecules when compared to the molecules measured by the USDA dataset (Figure 4C).

## Top candidates show strong repellency in additional applications

While the membrane feeder assay provides a rapid measurement of repellency effectiveness, for real-world applications it is necessary to consider the effect of odorants released by human skin. To assess repellency of hit molecules in the context of host skin emanations, we tested a representative set of our molecules in arm-by-cage experiments (Fig. 5A). To this end, we selected 31 hit molecules that showed  $\geq 75\%$  repellency at a density of  $25 \mu\text{g}/\text{cm}^2$  at  $T=120$  minutes at least once in the membrane feeder experiments, and 4 molecules with lower repellency activities. When tested at a density of  $13 \mu\text{g}/\text{cm}^2$  in the arm-by-cage experiments, 43% of the tested molecules perform very well ( $\geq 75\%$  repellency) and 67% of those even outperform DEET ( $>84\%$  repellency) (Fig. 5B). Overall, we observed high correspondence between repellency as measured in the feeder vs. the arm-in-cage assays ( $r=0.64$ ), with 83% of hits from the former also reaching the hit threshold in the latter (Fig. 5C).

Our primary assay assessed repellency against *A. stephensi*, but other pest species also carry disease, and there are some known species-specific differences in repellency of known molecules (e.g. IR3535). To address this concern, we selected 16 molecules based on their activity against *A. stephensi*, 9 strong and 7 weak repellents. We then used the original assay to test them against *A. aegypti* and a modified assay (Fig. 5D) to test against *I. scapularis*, the black-legged tick. We observed significant generalization across pest species: 8 of the strong repellents (88%) demonstrated good repellency ( $>50\%$  repellency) at  $25 \mu\text{g}/\text{cm}^2$  against *A. aegypti*, and 12 (75%) molecules were active ( $>75\%$  repellency) at  $540 \mu\text{g}/\text{cm}^2$  against *I. scapularis* ( $\text{ED}_{50}$  of DEET  $\approx 120 \mu\text{g}/\text{cm}^2$ , Fig. 5E).

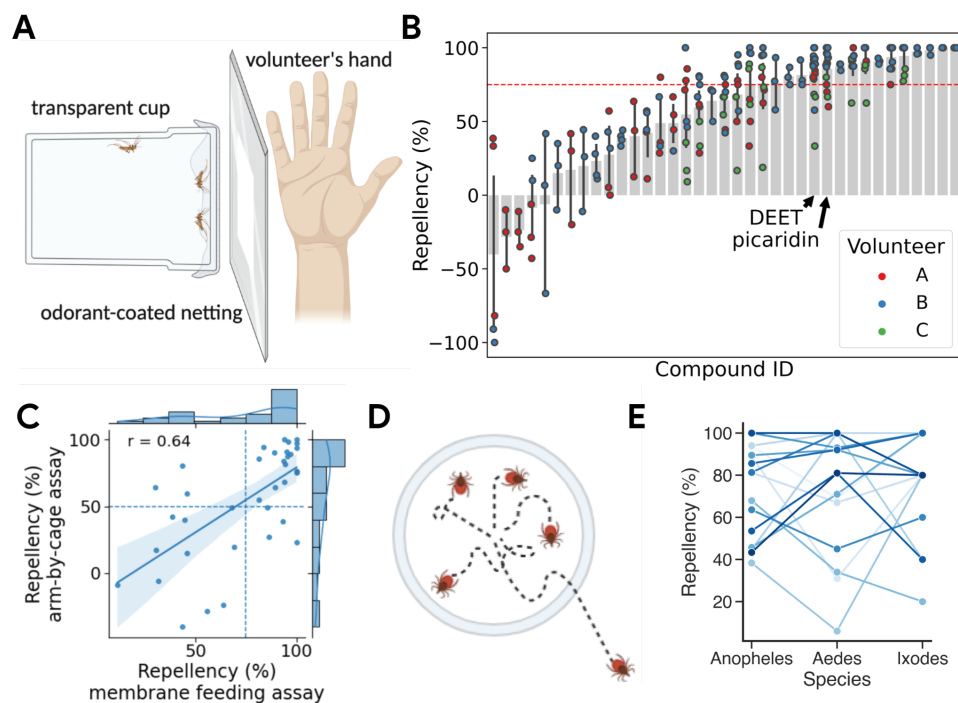

**Figure 5:** Model-selected and feeder assay validated compounds show high performance across context and species. **(A)** Experimental setup of arm-by-cage experiments on *Anopheles stephensi*. **(B)** Arm-by-cage repellency of molecules previously determined to be repellent in the membrane feeder assay. **(C)** Activities of repellents identified in the membrane feeding assay correlate well with the activity in arm-by-cage assays. **(D)** Experimental setup of *Ixodes scapularis* (tick) repellency assay. Ticks are placed in a repellent-impregnated ring on a heated bed and the number of ticks that cross the ring are counted. **(E)** Repellency of molecules is correlated across species; one line corresponds to one compound.

## Discussion

We developed and validated novel methods for identifying potential repellent molecules for vector control of deadly human and animal diseases. First, we digitized a historic dataset rich with an unprecedented volume of relevant repellency data covering thousands of molecules. Second, we applied and refined a deep learning model architecture to learn the mapping between molecular structure and repellency in this dataset. Third, we used a high-throughput experimental assay to prospectively validate predictions from this model, and to conduct active learning to iteratively improve model predictions. Finally, we showed that these predictions identify new repellent candidates in underexplored regions of chemical space, and that some of these molecules show applicability across real-life context and across pest species. This represents a promising approach to identify next-generation repellents and help solve one of humanity's greatest global health challenges.

Despite containing a surprisingly large quantity of relevant repellency data, the USDA dataset has remained underused, garnering only ~200 citations in the last 50 years. This surely stemmed in part from the limited visibility and accessibility of the data during most of this period, where it was accessible only via paper handbooks in physical libraries. The Google Books digitization project

scanned these handbooks, making images of the data visible to anyone with an internet connection. However, many of the chemical names contained there-in were archaic or ambiguous, and so could not be effortlessly mapped to chemical structures; the repellency values themselves were also not machine readable. The manual curation and digitization that we performed was the last step to unlock the power of these historical records. The general pattern of connecting diffuse experimental records to support larger modeling efforts and meta-analyses continues to bear fruit<sup>30,31</sup>.

How important were these data? Machine learning is data-driven, and frequently suffers from “cold start” problems; deep learning models are especially data-hungry, and finding enough data to train them to state-of-the-art performance can be a major challenge. The USDA dataset solved this problem by allowing us to train a draft model, which we were then able to build upon using data from a modern experimental assay. Several previous efforts to identify new repellents using machine learning have used only several dozen similar molecules to train their models<sup>15–17,32</sup>. A larger slice of the historical dataset (~2000 molecules) has been used to train a neural network model to both predict repellency and verify the repellency of known repellents<sup>33</sup>. Recently, larger datasets are becoming available for *receptor-targeted QSAR (RT-QSAR)*<sup>34,35</sup>, but until this current work, no machine-readable large-scale datasets have been available for BT-QSAR.

Most previous publications validated their repellency models only retrospectively by predicting the activity of known repellents, rather than prospectively<sup>36</sup> by using the model to identify new molecules with repellency behavior. This typically leads to overestimation of predictive performance of new repellent candidates. By contrast, we collected assay data for prospective validation of the model, and further used this data in an active learning loop to refine the model, showing continued improvement in predictive performance as new data was collected.

Prospective validation has been used in the past to discover new repellent molecules: Picaridin was discovered at Bayer using pharmacophore modeling<sup>6</sup>, and a small set of acylpiperdines were discovered using neural networks trained on a small subset of USDA data<sup>17</sup>. However, these novel repellents have typically been structural near-neighbors of existing repellents. By contrast, our model-selected candidates cover a much wider range of structural classes than previous repellency discovery attempts, facilitating our discovery of molecules with repellency activity greater than DEET even at 2 hours after application, and a subset that have repellency efficacy when tested in the presence of attractive human skin emanations.

Machine learning, and particularly deep learning, is yielding impressive advances in applications in chemistry. Several academic and industrial groups have used deep learning models to screen for new molecules with desirable properties, such as antibiotic activity or protein binding affinity<sup>34,37–39</sup>. The methods outlined in this paper can also be applied to other disease vectors, other classes of behavior-modifying molecules, and more broadly to enable hit discovery in arbitrary chemical applications. Future work will be required to impose additional filters or modeling steps to satisfy additional criteria related to safety, biodegradability, odor, and skin-feel, in conjunction with experimental data about these important factors.

## Methods

### Mosquitoes and ticks

Both *Anopheles stephensi* and *Aedes aegypti* mosquitoes were maintained on a 5% sugar solution in a 26 °C environment with 80% humidity, according to standard rearing procedures. Adult *Ixodes scapularis* ticks were maintained in a 26 °C environment with 90% humidity.

### Mosquito behavioral assays

Before each membrane feeding assay, 10-20 female *Anopheles stephensi* or *Aedes aegypti* mosquitoes (3-5 days old) were transferred to a paper cup covered with mosquito netting. The mosquitoes were denied access to their normal sugar solution 4-6 hours prior to the feeding assay. 30 µl of test molecule, dissolved in ethanol, was pipetted on a piece of mosquito netting (3x3 cm) and allowed to dry. To ensure a regular and standardized airflow over the samples, a gastronorm tray (½ 200mm) equipped with a computer fan (80x80x25mm, 12V, 0.08A) was placed over the samples. After a specified time of evaporation (e.g., 2 hours), the sample was placed on top of the cup containing the mosquitoes. The cups were then placed under a row of glass membrane feeders containing a pre-warmed (37 °C) blood meal. The mosquitoes were allowed to feed for 15 minutes. The number of fed and unfed mosquitoes were then recorded.

For the arm-by-cage assays, 30-50 female *Anopheles stephensi* mosquitoes were transferred to an acrylic cup (150x100mm) covered with mosquito netting. 1 mL of test molecule (0.5% w/v), dissolved in ethanol, was pipetted on a piece of cheesecloth (6x9 cm) and taped to an acrylic panel (6mm thick) with a cutout and allowed to dry. A panel with an untreated piece of cloth was then placed next to the acrylic cups containing the mosquitoes and a volunteer placed his hand against the panel for 5 minutes. The mosquitoes were filmed and the maximum number of mosquitoes landing simultaneously was recorded. This was then repeated with a piece of treated cloth and the number of landings was normalized to the control, which is the ethanol solvent alone. All arm-by-cage assays were designed and run by TropIQ.

### Tick behavioral assays

The setup of the tick repellency assay is shown in figure 5D. The assay consists of a heated (37°C) aluminum plate (235 x 235 mm) that is painted white. Before the test, 750 µl of test molecule, dissolved in ethanol, is pipetted on a ring of filter paper (OD = 150 mm, ID = 122 mm). The ring is then transferred onto the heated plate and 5 *Ixodes scapularis* ticks are placed in the center. The ticks are monitored for 5 minutes and the number of ticks that cross the filter paper are counted. Repellency is expressed as the percentage of ticks that did not cross the filter paper.

### Historical dataset preparation

The scanned versions of the USDA datasets, available from Google Books, were converted into a machine-readable format. Chemical structures (Simplified Molecular-Input Line-Entry System, or

SMILES)<sup>40</sup> were assigned to each single molecule entry in the dataset. The raw PDFs of the two repellency handbooks<sup>41,42</sup> used to create the USDA dataset are available on Google Books. For this study, the PDFs were converted to png files, then sliced by rows according to bounding boxes drawn by curators. The row sliced images and the full page images were provided to a third-party curation service, who transcribed the chemical names as SMILES and corresponding assay results. Post-processing analysis and evaluation of a random sample of 150 entries suggest an error rate of <5% in the chemical structures. The final dataset resulted in 18,886 data points on 14,187 molecules. This includes the results on two assay setups, one testing the effectiveness of the candidates on cloth, the other on human skin, and also two different mosquito species (*Aedes aegypti* and *Anopheles quadrimaculatus*); all four combinations of these two species and conditions were used in this study. USDA dataset labels in the source material were repellency ratings given as integers from 1 (worst) to 5 (best).<sup>41</sup>

## USDA Dataset Modeling and Representation Learning

Each of the USDA tasks was split into a 70:15:15 train/validation/test split such that molecules were assigned to the same split across all tasks; in particular, if a molecule is in the training set for one task, it was also in the training split for the other tasks for which there was a measurement. Molecules in the USDA dataset that were also used in the pre-USDA phase (Batches 1-3, see Supplementary Batch notes) were excluded from the USDA training sets. Iterative stratification over the label classes across each task was applied to balance the labels in the training/validation/test splits for each task.

Graph neural network models (GNNs) were trained on each of the four mosquito repellent tasks from the USDA dataset. Each model provided predicted probabilities of the class label and combination class labels; specifically, the model predicted the probability of the class label being: [1], [2], [3], [4], [5], [1 OR 3 OR 4 OR 5], [3 OR 4 OR 5], [1 OR 4 OR 5]. AUROC performance on the [3 OR 4 OR 5] label objective was used to optimize the models. The graph neural network used message passing layers (MPNN<sup>44</sup>), with a max atom size of 45, 30 atom features, and 6 bond features. Hyperparameter selections were made using the Vizier<sup>43</sup> default Bayesian optimization algorithm over 300 trials.

The USDA learned representation was constructed from the outputs of the frozen ensemble model of the best 50 models from hyperparameters trained on the USDA dataset. For the last batch of selections, the models used to create the ensemble model ranged in AUROC performance from 0.872 to 0.881.

## Model Training on Membrane Feeding Assay Data

To train the models for activity in membrane feeding assays, assay results were binarized: a positive label for repellency activity was defined as >90% at T=2min at 25  $\mu\text{g}/\text{cm}^2$ , and >75% for T=120min. For model evaluation and hyperparameter selection, the dataset was split into a 70:30 train/test split, using iterative stratification to balance the label classes. The model trained on the USDA dataset was used to generate specialized representations for the molecules. A two-layer neural network model with 256 nodes was used to predict the binarized activity label given the molecule; the

hyperparameters of this model were selected with grid search. At inference time, to make predictions on new candidates, the model was retrained using the entire dataset.

## Molecule Selection

We began by filtering molecules listed in the eMolecules catalog -- which contains ~1 million commercially available molecules -- for atom composition (C/N/O/S/H only), price (<\$1000 per 10 grams), purity (>95%), and availability (<4 weeks lead time). We utilized a toxicity filter to remove potentially harmful molecules, according to a toxicologist-recommended protocol. In this protocol, we classified molecules by their mutagen / Cramer class using ToxTree, calculated their vapor pressure at room temperature, and then compared the likely exposure air volume to OSHA daily exposure limits for the corresponding toxicity class. We removed likely odorless molecules according to water-soluble (cLogP < 0) and nonvolatile (boiling point > 300 C) criteria. We manually removed molecules that were likely to degrade or react under our experimental conditions. After training the assay model, molecules were selected such that they had a prediction score above an f1 optimized cutoff score, and then selected such that they had a Tanimoto similarity of <0.8 from other selected molecules and the USDA dataset. A minimum solubility threshold of 10 mg/ml in absolute ethanol was used as a last criterion. Molecules with an ethanol solubility below the threshold were abandoned. Detailed selection criteria for batches are reported in the Supplemental section.

## Author Contributions:

JNW, DMA, KMG, ABW curated and digitized the USDA dataset; JNW, BKL performed data cleaning and spotchecking of the dataset. MV and KJD designed the mosquito assay and tick assay experiments; MV, LB, MWV, and RWMH performed the mosquito assay experiments; MV and MWV performed tick assay experiments. JNW designed the models with assistance from BS-L, BKL, and WWQ. JNW, MV, BS-L, RCG performed data analysis. JNW, MV, RCG wrote the manuscript. ABW and KJD conceived the project. All authors contributed to editing the manuscript.

## Acknowledgements

We wish to thank Laura Pelsen-Posthumus for technical assistance in mosquito rearing, and Geert-Jan van Gemert and Pascal Miesen for provision of mosquitoes. We thank Hans Dautel for help with the design of the tick repellency assay. The authors thank Lucy Colwell, James Thompson, Max Bileschi, and David Belanger for critical reading of the manuscript. We also thank Sameer Kulkarni for assistance with OCR processing and Jonathan Brecher for his insights on transcribing structures from historical chemical names. We thank Jeff Riffel, Carlos Ruiz, Ben Adlam, Jasper Snoek, and the Cambridge Brain Research team for giving helpful feedback during our discussions. Some of the figures were created with BioRender.com. We also thank the Bill and Melinda Gates Foundation for their generous support of this work.

## References Cited

1. Simmons, C. P., Farrar, J. J., Nguyen, van V. C. & Wills, B. Dengue. *N. Engl. J. Med.* **366**, 1423–1432 (2012).
2. Vector-borne diseases. <https://www.who.int/news-room/fact-sheets/detail/vector-borne-diseases>.
3. DEET. <http://npic.orst.edu/factsheets/archive/DEETtech.html>.
4. FA Morton, BV Travis, JP Linduska. *Results of screening tests with materials evaluated as insecticides, miticides and repellents at the Orlando, Fla., laboratory : April 1942 to April 1947*. (US Department of Agriculture, Bureau of Entomology and Plant Quarantine, 1947).
5. Travis, Morton & Jones. The more effective mosquito repellents tested at the Orlando, Fla., Laboratory, 1942–47. *J. Econ. Financ. Stud.* (1949).
6. Boeckh, J. *et al.* Acylated 1,3-aminopropanols as repellents against bloodsucking arthropods. *Pestic. Sci.* **48**, 359–373 (1996).
7. Jones, P. L., Pask, G. M., Rinker, D. C. & Zwiebel, L. J. Functional agonism of insect odorant receptor ion channels. *Proc. Natl. Acad. Sci. U. S. A.* **108**, 8821–8825 (2011).
8. Sun, H., Tawa, G. & Wallqvist, A. Classification of scaffold-hopping approaches. *Drug Discov. Today* **17**, 310–324 (2012).
9. Klier & Kuhlow. Neue Insektenabwehrmittel—Am Stickstoff disubstituierte beta-Alaninderivate. *J. Soc. Cosmet. Chem.* (1976).
10. Kalyanasundaram, M. A preliminary report on the synthesis and testing of mosquito repellents. *Indian J. Med. Res.* **76**, 190–194 (1982).
11. Dickens, J. C. & Bohbot, J. D. Mini review: Mode of action of mosquito repellents. *Pestic. Biochem. Physiol.* **106**, 149–155 (2013).
12. Ditzen, M., Pellegrino, M. & Vosshall, L. B. Insect odorant receptors are molecular targets of the insect repellent DEET. *Science* **319**, 1838–1842 (2008).
13. Abd-Ella, A. *et al.* The Repellent DEET Potentiates Carbamate Effects via Insect Muscarinic Receptor Interactions: An Alternative Strategy to Control Insect Vector-Borne Diseases. *PLoS One* **10**, e0126406 (2015).
14. Moreau, E. *et al.* Orthosteric muscarinic receptor activation by the insect repellent IR3535 opens new prospects in insecticide-based vector control. *Sci. Rep.* **10**, 6842 (2020).
15. Wright, R. H. Physical basis of insect repellency. *Nature* **178**, 638 (1956).
16. Katritzky, A. R. *et al.* Synthesis and bioassay of improved mosquito repellents predicted from chemical structure. *Proc. Natl. Acad. Sci. U. S. A.* **105**, 7359–7364 (2008).
17. Bernier, U. R. & Tsikolia, M. Development of Novel Repellents Using Structure–Activity Modeling of Compounds in the USDA Archival Database. in *Recent Developments in Invertebrate Repellents* vol. 1090 21–46 (American Chemical Society, 2011).
18. Katritzky, A. R. *et al.* Novel Carboxamides as Potential Mosquito Repellents. *Journal of Medical Entomology* vol. 47 924–938 (2010).
19. Gwern. The Scaling Hypothesis. *gwern.net* <https://www.gwern.net/Scaling-hypothesis>.
20. Wu, Z. *et al.* MoleculeNet: a benchmark for molecular machine learning. *Chem. Sci.* **9**, 513–530 (2018).
21. Duvenaud, D. K. *et al.* Advances in Neural Information Processing Systems 28. Cortes C. ,

- Lawrence ND, Lee DD, Sugiyama M. , Garnett R. , Eds 2224–2232 (2015).
22. Boyd. Epidemiology: factors related to the definitive host. *Malariaology* (1949).
  23. Churcher, T. S. et al. Measuring the blockade of malaria transmission--an analysis of the Standard Membrane Feeding Assay. *Int. J. Parasitol.* **42**, 1037–1044 (2012).
  24. Duvenaud, D. et al. Convolutional networks on graphs for learning molecular fingerprints. *arXiv [cs.LG]* (2015).
  25. Sanchez-Lengeling, B., Wei, J. N. & Lee, B. K. Machine Learning for Scent: Learning Generalizable Perceptual Representations of Small Molecules. *arXiv preprint arXiv* (2019).
  26. Qian, W. W. et al. Metabolic activity organizes olfactory representations. *bioRxiv* 2022.07.21.500995 (2022) doi:10.1101/2022.07.21.500995.
  27. eMolecules. eMolecules. <https://www.emolecules.com/>.
  28. Moriwaki, H., Tian, Y.-S., Kawashita, N. & Takagi, T. Mordred: a molecular descriptor calculator. *J. Cheminform.* **10**, 4 (2018).
  29. Djoumbou Feunang, Y. et al. ClassyFire: automated chemical classification with a comprehensive, computable taxonomy. *J. Cheminform.* **8**, 61 (2016).
  30. Siguenza-Guzman, L., Saquicela, V., Avila-Ordóñez, E., Vandewalle, J. & Cattrysse, D. Literature Review of Data Mining Applications in Academic Libraries. *The Journal of Academic Librarianship* **41**, 499–510 (2015).
  31. Tripathy, S. J., Savitskaya, J., Burton, S. D., Urban, N. N. & Gerkin, R. C. NeuroElectro: a window to the world's neuron electrophysiology data. *Front. Neuroinform.* **8**, 40 (2014).
  32. Boyle, S. M. et al. Natural DEET substitutes that are strong olfactory repellents of mosquitoes and flies. *bioRxiv* 060178 (2016) doi:10.1101/060178.
  33. Devillers, J., Sartor, V., Doucet, J. P., Doucet-Panaye, A. & Devillers, H. In silico prediction of mosquito repellents for clothing application. *SAR QSAR Environ. Res.* **33**, 239–257 (2022).
  34. McCloskey, K. et al. Machine Learning on DNA-Encoded Libraries: A New Paradigm for Hit Finding. *J. Med. Chem.* **63**, 8857–8866 (2020).
  35. Caballero-Vidal, G. et al. Machine learning decodes chemical features to identify novel agonists of a moth odorant receptor. *Sci. Rep.* **10**, 1655 (2020).
  36. Kearnes, S. Pursuing a Prospective Perspective. *TRECHEM* **3**, 77–79 (2021).
  37. Stokes, J. M. et al. A Deep Learning Approach to Antibiotic Discovery. *Cell* **180**, 688–702.e13 (2020).
  38. Zhavoronkov, A. et al. Deep learning enables rapid identification of potent DDR1 kinase inhibitors. *Nat. Biotechnol.* **37**, 1038–1040 (2019).
  39. Jin, W. et al. Deep learning identifies synergistic drug combinations for treating COVID-19. *Proc. Natl. Acad. Sci. U. S. A.* **118**, (2021).
  40. Weininger, D. SMILES, a chemical language and information system. 1. Introduction to methodology and encoding rules. *J. Chem. Inf. Comput. Sci.* **28**, 31–36 (1988).
  41. King, W. V. (willard V. O. Chemicals evaluated as insecticides and repellents at Orlando, Fla. (1954).
  42. United States & Entomology Research Division. Materials evaluated as insecticides, repellents, and chemosterilants at Orlando and Gainesville, Fla., 1952-1964. (1967).
  43. Golovin, D. et al. Google Vizier: A Service for Black-Box Optimization. in *Proceedings of the 23rd ACM SIGKDD International Conference on Knowledge Discovery and Data Mining* 1487–1495 (Association for Computing Machinery, 2017).



44. Gilmer, J., Schoenholz, S. S., Riley, P. F., Vinyals, O. & Dahl, G. E. Message Passing Neural Networks. in *Machine Learning Meets Quantum Physics* (eds. Schütt, K. T. et al.) 199–214 (Springer International Publishing, 2020).
45. Oliferenko, P. V. et al. Promising *Aedes aegypti* repellent chemotypes identified through integrated QSAR, virtual screening, synthesis, and bioassay. *PLoS One* **8**, e64547 (2013).
46. Carey, A. F., Wang, G., Su, C.-Y., Zwiebel, L. J. & Carlson, J. R. Odorant reception in the malaria mosquito *Anopheles gambiae*. *Nature* **464**, 66–71 (2010).
47. Xu, P., Choo, Y.-M., De La Rosa, A. & Leal, W. S. Mosquito odorant receptor for DEET and methyl jasmonate. *Proc. Natl. Acad. Sci. U. S. A.* **111**, 16592–16597 (2014).
